# Supplementary material for: Differential Expressions of Adhesive Molecules and Proteases Define Mechanisms of Ovarian Tumor Cell Matrix Penetration/Invasion
Source: PLoS One. 2011 Apr 19;6(4):e18872. doi: 10.1371/journal.pone.0018872 (PMC3079735; doi:10.1371/journal.pone.0018872)
Supplement: Table S2 — Intensity change of fibronectin induced by OVCAR5 cells in the presence and absence of various inhibitors measured at the top, middle, and bottom parts of 3D culture. (DOC) [file pone.0018872.s008.doc]

**Table S2.** Intensity change of fibronectin induced by OVCAR5 cells in the presence and absence of various inhibitors measured at the top, middle, and bottom parts of 3D culture.

| Inhibitors | Top | Middle | Bottom |
| --- | --- | --- | --- |
| Untreated | 23  4.5a3) | 41  10.9ab | 100  28.1ab |
| Y27632 | 26  5.5ab | 26  4.9ab | 110  34.0a |
| H1152 | 16  2.8a | 29  4.4ab | 92  28.5ab |
| Aprotinin | 35  14.9abc | 40  23.7ab | 94  59.3a |
| Leupeptin | 29  7.7ab | 36  12.5ab | 80  24.4a |
| GM6001 | 19  2.0ab | 18  2.2a | 30  4.7a |
| PI1) | 77  8.0c | 45  12.8ab | 36  13.4a |
| PRI2) | 23  4.7ab | 60  17.5ab | 159  86.8ab |
| Amiloride | 27  9.7a | 80  27.7ab | 314  60.1b |
| 1-integrin | 86  31.6bc | 82  19.1b | 189  53.3ab |

1) PI: protease inhibitor cocktail of aprotinin, leupeptin, and GM6001

2) PRI: cocktail of PI and H1152

3) Mean  SE (n=5~10), no significant difference (p > 0.01) was found among groups bearing the same letter of alphabets within top, middle, and bottom.
