# Supplementary material for: Differential Expressions of Adhesive Molecules and Proteases Define Mechanisms of Ovarian Tumor Cell Matrix Penetration/Invasion
Source: PLoS One. 2011 Apr 19;6(4):e18872. doi: 10.1371/journal.pone.0018872 (PMC3079735; doi:10.1371/journal.pone.0018872)
Supplement: Table S3 — Intensity change of total matrix protein by OVCAR10 cells in the presence and absence of various inhibitors measured at the top, middle, and bottom parts of 3D culture. (DOC) [file pone.0018872.s009.doc]

**Table S3.** Intensity change of total matrix protein by OVCAR10 cells in the presence and absence of various inhibitors measured at the top, middle, and bottom parts of 3D culture.

| Inhibitors | Top | Middle | Bottom |
| --- | --- | --- | --- |
| Untreated | 186  32.5de3) | 103  16.1abcd | 100  12.3a |
| Y27632 | 92  12.4bc | 80  8.1abc | 98  9.7a |
| H1152 | 58  7.9ab | 65  4.7ab | 90  10.1a |
| Aprotinin | 139  23.5cd | 114  12.7cd | 102  9.7a |
| Leupeptin | 214  19.6de | 149  9.4d | 109  10.7a |
| GM6001 | 245  41.1de | 156  20.2d | 150  34.2a |
| PI1) | 172  38.8de | 118  11.2cd | 110  15.4a |
| PRI2) | 46  10.6a | 63  10.5a | 100  9.7a |
| Amiloride | 258  30.6e | 162  19.0d | 150  24.6a |
| 1-integrin | 186  38.0de | 101  20.1abcd | 82  17.3a |

1) PI: protease inhibitor cocktail of aprotinin, leupeptin, and GM6001

2) PRI: cocktail of PI and H1152

3) Mean  SE (n=5~10), no significant difference (p > 0.01) was found among groups bearing the same letter of alphabets within top, middle, and bottom.
