# Supplementary material for: Differential Expressions of Adhesive Molecules and Proteases Define Mechanisms of Ovarian Tumor Cell Matrix Penetration/Invasion
Source: PLoS One. 2011 Apr 19;6(4):e18872. doi: 10.1371/journal.pone.0018872 (PMC3079735; doi:10.1371/journal.pone.0018872)
Supplement: Table S4 — Intensity change of fibronectin induced by OVCAR10 cells in the presence and absence of various inhibitors measured at the top, middle, and bottom parts of 3D culture. (DOC) [file pone.0018872.s010.doc]

**Table S4.** Intensity change of fibronectin induced by OVCAR10 cells in the presence and absence of various inhibitors measured at the top, middle, and bottom parts of 3D culture.

| Inhibitors | Top | Middle | Bottom |
| --- | --- | --- | --- |
| Untreated | 1093  187.5c3) | 202  18.8a | 100  22.9a |
| Y27632 | 561  107.6ab | 179  36.2a | 119  26.8a |
| H1152 | 319  65.4a | 137  30.2a | 111  30.0a |
| Aprotinin | 868  165.5bc | 224  33.0a | 111  27.2a |
| Leupeptin | 683  114.2bc | 185  25.1a | 81  13.4a |
| GM6001 | 1019  177.5bc | 230  44.1a | 89  27.5a |
| PI1) | 696  81.2bc | 224  45.3a | 125  43.1a |
| PRI2) | 334  44.6a | 204  32.5a | 305  99.6a |
| Amiloride | 1143  187.7c | 215  29.1a | 113  20.3a |
| 1-integrin | 858  52.3bc | 158  22.6a | 102  19.1a |

1) PI: protease inhibitor cocktail of aprotinin, leupeptin, and GM6001

2) PRI: cocktail of PI and H1152

3) Mean  SE (n=5~10), no significant difference (p > 0.01) was found among groups bearing the same letter of alphabets within top, middle, and bottom.
